# Supplementary material
Source: PubMed Central journal article supplement (PMC7006481)
Supplement: NIHMS1543077-supplement-1.pdf [file NIHMS1543077-supplement-1.pdf]

**Table S1. Baseline characteristics by antibiotic use at ages 20-39 – Nurses' Health Study I**

|                            | <b>No use<br/>(n = 7,029)</b> | <b>Less than 2 months<br/>(n = 35,679)</b> | <b>2 months or more<br/>(n = 3,628)</b> |
|----------------------------|-------------------------------|--------------------------------------------|-----------------------------------------|
| Age, years*                | 72.0 (6.8)                    | 68.2 (6.6)                                 | 66.0 (6.2)                              |
| BMI, kg/m <sup>2</sup>     | 26.2 (5.0)                    | 26.6 (5.3)                                 | 27.0 (5.7)                              |
| History of hypertension, % | 54.6                          | 56.8                                       | 60.5                                    |
| Thiazide diuretic use, %   | 15.6                          | 18.5                                       | 20.9                                    |
| History of diabetes, %     | 8.8                           | 9.8                                        | 11.4                                    |
| Total fluid intake, mL     | 1,701 (700)                   | 1,754 (690)                                | 1,838 (706)                             |
| Alcohol, g                 | 6.0 (10.4)                    | 6.3 (10.8)                                 | 5.7 (10.9)                              |
| Dietary calcium, mg        | 869 (334)                     | 857 (318)                                  | 864 (321)                               |
| Supplemental calcium, mg   | 600 (519)                     | 637 (525)                                  | 696 (551)                               |
| Animal protein, g          | 45.2 (14.3)                   | 46.4 (13.5)                                | 47.0 (13.9)                             |
| Potassium, mg              | 3,090 (614)                   | 3,078 (589)                                | 3,087 (603)                             |
| Sodium, mg                 | 1,966 (433)                   | 2,001 (428)                                | 2,002 (414)                             |
| Oxalate, mg                | 176 (104)                     | 174 (99)                                   | 175 (96)                                |
| Magnesium, mg              | 368 (121)                     | 374 (123)                                  | 391 (138)                               |
| Vitamin D, IU              | 562 (347)                     | 572 (334)                                  | 587 (343)                               |
| Vitamin C, mg              | 347 (366)                     | 376 (400)                                  | 424 (421)                               |
| Sucrose, g                 | 38.5 (16.2)                   | 37.8 (15.6)                                | 37.8 (15.9)                             |

BMI, body mass index. Values are means (SD) or percentages and are standardized to the age distribution of the study population. \* Value is not age adjusted

**Table S2. Baseline characteristics by antibiotic use at ages 20-39 – Nurses' Health Study II**

|                            | <b>No use<br/>(n = 6,631)</b> | <b>Less than 2 months<br/>(n = 51,795)</b> | <b>2 months or more<br/>(n = 7,562)</b> |
|----------------------------|-------------------------------|--------------------------------------------|-----------------------------------------|
| Age, years*                | 48.6 (5.2)                    | 50.5 (4.6)                                 | 50.4 (4.2)                              |
| BMI, kg/m <sup>2</sup>     | 25.8 (5.4)                    | 27.2 (6.3)                                 | 28.4 (7.2)                              |
| History of hypertension, % | 18.3                          | 24.7                                       | 32.9                                    |
| Thiazide diuretic use, %   | 5.3                           | 8.3                                        | 12.2                                    |
| History of diabetes, %     | 2.3                           | 3.9                                        | 6.6                                     |
| Total fluid intake, mL     | 1748 (888)                    | 1768 (906)                                 | 1849 (910)                              |
| Alcohol, g                 | 6.0 (9.7)                     | 5.8 (9.5)                                  | 5.0 (9.6)                               |
| Dietary calcium, mg        | 954 (343)                     | 937 (328)                                  | 936 (329)                               |
| Supplemental calcium, mg   | 468 (497)                     | 488 (504)                                  | 532 (521)                               |
| Animal protein, g          | 54.0 (16.9)                   | 54.9 (15.9)                                | 55.5 (15.9)                             |
| Potassium, mg              | 3220 (640)                    | 3194 (601)                                 | 3160 (615)                              |
| Sodium, mg                 | 2228 (492)                    | 2267 (472)                                 | 2291 (473)                              |
| Oxalate, mg                | 197 (125)                     | 194 (124)                                  | 189 (108)                               |
| Magnesium, mg              | 375 (124)                     | 374 (121)                                  | 378 (126)                               |
| Vitamin D, IU              | 494 (336)                     | 498 (334)                                  | 516 (342)                               |
| Vitamin C, mg              | 300 (372)                     | 305 (370)                                  | 337 (409)                               |
| Sucrose, g                 | 40.0 (17.5)                   | 40.2 (17.4)                                | 40.7 (18.4)                             |

BMI, body mass index. Values are means (SD) or percentages and are standardized to the age distribution of the study population. \* Value is not age adjusted
